# Supplementary material for: The solvent effect and identification of a weakly emissive state in nonradiative dynamics of guanine nucleosides and nucleotides — a combined femtosecond broadband time-resolved fluorescence and transient absorption study
Source: Royal Society of Chemistry journal article supplement (doi:10.1039/c3pp25450j), 2013-03-05
Supplement: c3pp25450j.pdf [file c3pp25450j.pdf]

# The Solvent effect and identification of a weakly emissive state in nonradiative dynamics of guanine nucleoside and nucleotide- A combined femtosecond broadband time-resolved fluorescence and transient absorption study

Chopen Chan-Wut Cheng,<sup>1</sup> Chensheng Ma,<sup>\*2</sup> Chris Tsz-Leung Chan,<sup>1</sup> Keith Yat-Fung  
Ho<sup>1</sup> and Wai-Ming Kwok<sup>\*1</sup>

<sup>1</sup>*Department of Applied Biology and Chemical Technology, The Hong Kong Polytechnic  
University, Hung Hom, Kowloon, Hong Kong, China.*

<sup>2</sup>*Department of Chemistry, The University of Hong Kong, Pokfulam Road, Hong Kong, China.*

*Fax: (+852)2364-9932; E-mail: wm.kwok@polyu.edu.hk; macs@hku.hk*

## Supporting Information

**Description of Kerr-gate technique** for recording femtosecond broadband time-resolved fluorescence and fluorescence anisotropy spectra

**Figure S1** Steady-state absorption and fluorescence spectra of dG and dGMP in pH7 buffered water and methanol with the varied concentrations

**Figure S2** Femtosecond broadband time-resolved fluorescence spectra and fluorescence decay profiles of dG in pH7 buffered water with excitation at 267 and 285nm

**Table S1** Fitting parameters obtained from global analysis of the fluorescence decay profiles at selected emission wavelengths

**Figure S3** Comparison of fs-TRF spectra recorded at 5 ps after 285, 267 and 245 nm excitation of dG and dGMP in pH7 buffered water

**Figure S4** Femtosecond broadband time-resolved fluorescence anisotropy spectra of dG in pH7 buffered water and methanol recorded with excitation at 267 and 285 nm

**Figure S5** Femtosecond broadband transient absorption spectra (220-400 nm) of dG in pH7 buffered water, pure water and D<sub>2</sub>O with excitation at 267 nm

**Figure S6** Comparison of the fs-TA decay profiles obtained at ~253 and 305 nm after 267 nm excitation of dG and dGMP in pH7 buffered water, pure water, D<sub>2</sub>O and methanol

**Table S2** Fitting parameters obtained from global analysis of the fs transient absorption decay profiles at the selected wavelengths

**References**

**Description of Kerr-gate technique** for recording femtosecond broadband time-resolved fluorescence and fluorescence anisotropy spectra:

A Kerr device comprising a  $\sim 1$  mm thickness of quartz plate (Kerr medium) equipped with a crossed polarizer pair was used to function as an ultrafast shutter to sample broadband transient fluorescence signal at a series of designated pump-probe delay times. Part of the 800 nm fs laser (from Ti:Sapphire regenerative amplifier laser system) was applied as gating pulse (or also called probe pulse) to drive the Kerr device for attaining the fs wavelength-resolved fluorescence spectra.<sup>1</sup>

In the fs-TRF measurement, to obtain the overall fs-TRF spectra, in order to eliminate the effect due to rotational diffusion, the polarization direction of the pump laser was set at the magic angle relative to that of the first polarizer in the Kerr device.

For the measurement of fs-TRFA spectra  $r(t)$ , the experiments were done by setting the polarization direction of the pump laser to be either parallel or perpendicular to that of the first Kerr-gate polarizer so as to measure the spectrum of  $I_{\text{para}}(t)$  and  $I_{\text{perp}}(t)$ , respectively. The  $r(t)$  was then derived according to  $r(t) = [I_{\text{para}}(t) - I_{\text{perp}}(t)] / [(I_{\text{para}}(t) + 2I_{\text{perp}}(t))]$ .<sup>2,3</sup>

**Figure S1** Steady-state absorption (a, c and e) and steady-state fluorescence (b, d, f) spectra recorded with excitation at 267 nm (solid) and 285 nm (dotted) for dGMP in buffered (pH7) water (a, b), dG in buffered (pH7) water (c, d) and methanol (e, f) with different concentrations of 0.1 mM (red), 1 mM (green) and 10 mM (cyan)

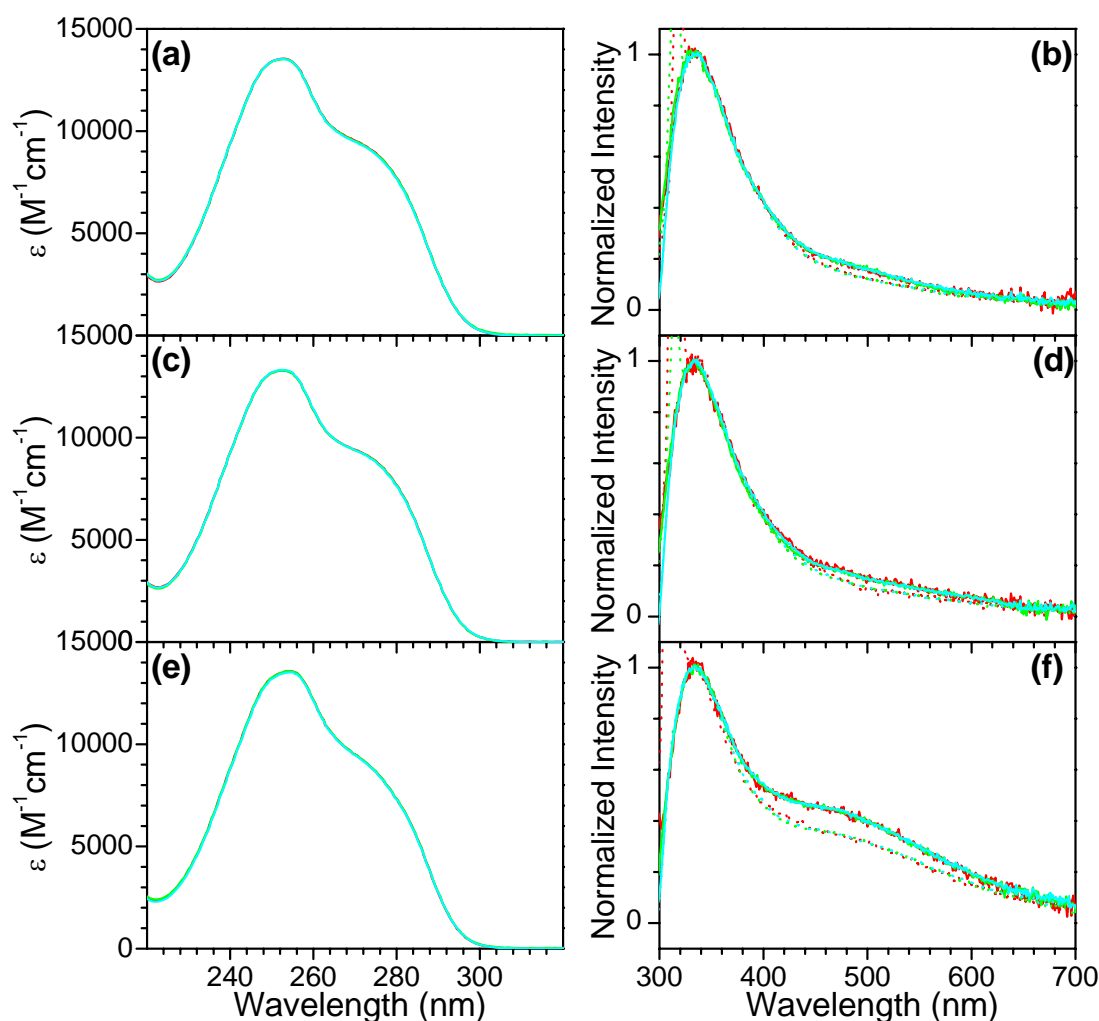

**Figure S2** Upper panel: femtosecond time-resolved fluorescence spectra of dG (~2-5 mM) in buffered (pH7) water recorded at various delay times (0.05, 0.1, 0.15, 0.2, 0.25, 0.3, 0.35, 0.4, 0.45, 0.5, 0.6, 0.7, 0.85, 1, 1.2, 1.4, 1.6, 1.8, 2, 2.25, 2.5, 2.75, 3, 3.25, 3.5, 3.75, 4, 4.5, 5, 5.5, 6, 6.5, 7, 7.5, 8, 8.5, 9, 9.5, 10 ps) after excitation at 267 (upper, left) and 285 nm (upper, right). Representative transient fluorescence spectra at indicated decay times are normalized with respect to their maximum intensities in order to show clearly temporal variation of the transient spectral profiles. Lower panel: experimental (circle, square, triangle) and fitted (solid lines) fluorescence decay profiles obtained for dG in pH7 buffered water with excitation at 267 (bottom, left) and 285 (bottom, right) nm.

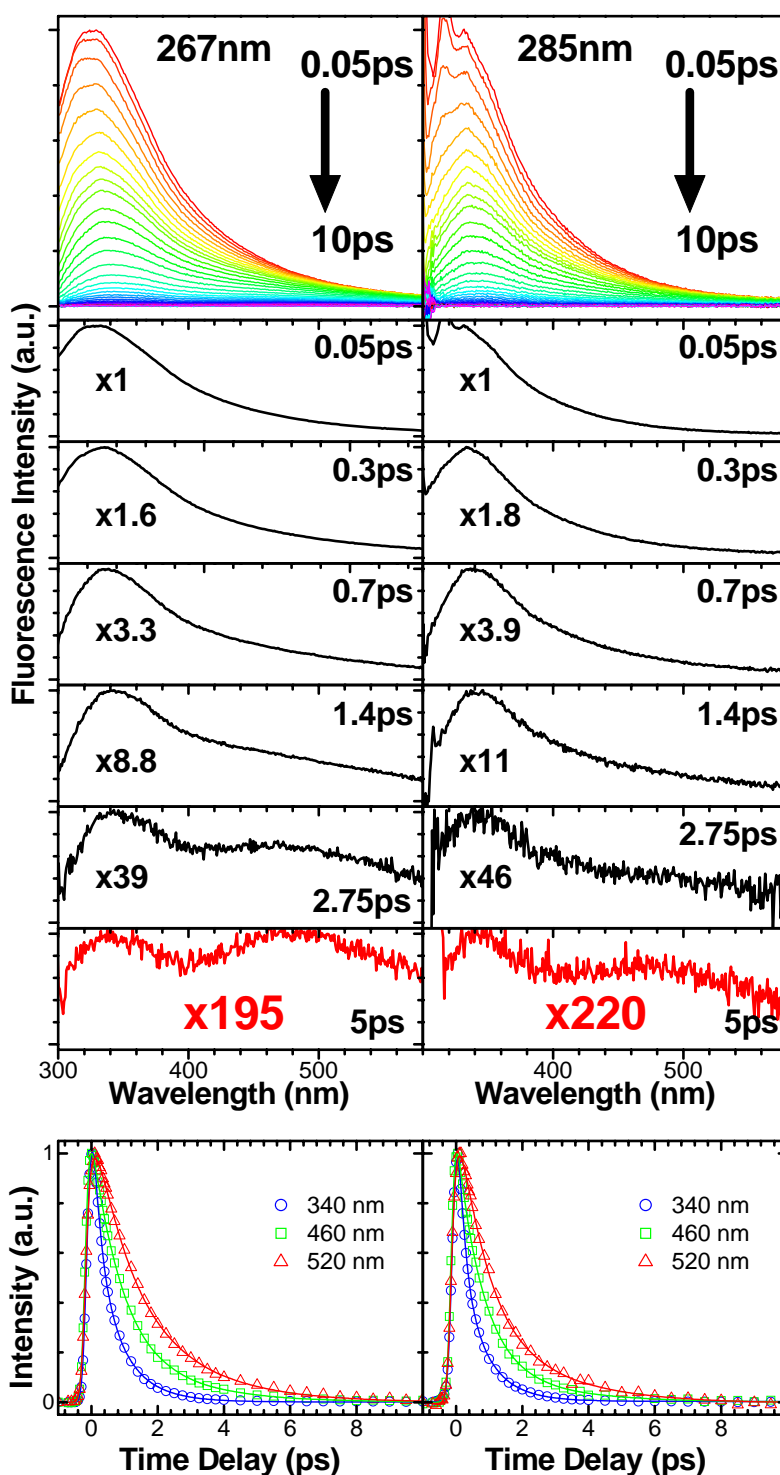

**Table S1** Fitting parameters obtained from global analysis of the fs time-resolved fluorescence decay profiles at the representative wavelengths

| dGMP in H <sub>2</sub> O (pH7) |                |               |       |               |       |               |       |
|--------------------------------|----------------|---------------|-------|---------------|-------|---------------|-------|
| $\lambda_{\text{ex}}$ (nm)     | $\lambda$ (nm) | $\tau_1$ (ps) | $a_1$ | $\tau_2$ (ps) | $a_2$ | $\tau_3$ (ps) | $a_3$ |
| 245                            | 340            |               | 0.65  |               | 0.34  |               | 0.01  |
|                                | 460            |               | 0.01  |               | 0.73  |               | 0.26  |
|                                | 520            |               | -0.24 |               | 0.32  |               | 0.43  |
| 267                            | 340            | 0.20 ± 0.03   | 0.57  | 0.79 ± 0.04   | 0.42  | 1.98 ± 0.10   | 0.00  |
|                                | 460            |               | -0.07 |               | 0.68  |               | 0.25  |
|                                | 520            |               | -0.28 |               | 0.31  |               | 0.41  |
| 285                            | 340            |               | 0.65  |               | 0.35  |               | 0.00  |
|                                | 460            |               | -0.05 |               | 0.82  |               | 0.14  |
|                                | 520            |               | -0.25 |               | 0.45  |               | 0.30  |

  

| dG in H <sub>2</sub> O (pH7) |                |               |       |               |       |               |       |
|------------------------------|----------------|---------------|-------|---------------|-------|---------------|-------|
| $\lambda_{\text{ex}}$ (nm)   | $\lambda$ (nm) | $\tau_1$ (ps) | $a_1$ | $\tau_2$ (ps) | $a_2$ | $\tau_3$ (ps) | $a_3$ |
| 267                          | 340            |               | 0.52  |               | 0.47  |               | 0.01  |
|                              | 460            |               | -0.14 |               | 0.63  |               | 0.23  |
|                              | 520            |               | -0.29 |               | 0.32  |               | 0.39  |
|                              |                | 0.22 ± 0.02   |       | 0.77 ± 0.02   |       | 1.99 ± 0.11   |       |
| 285                          | 340            |               | 0.61  |               | 0.39  |               | 0.01  |
|                              | 460            |               | -0.01 |               | 0.83  |               | 0.16  |
|                              | 520            |               | -0.28 |               | 0.50  |               | 0.22  |

  

| dG in CH <sub>3</sub> OH   |                |               |       |               |       |               |       |
|----------------------------|----------------|---------------|-------|---------------|-------|---------------|-------|
| $\lambda_{\text{ex}}$ (nm) | $\lambda$ (nm) | $\tau_1$ (ps) | $a_1$ | $\tau_2$ (ps) | $a_2$ | $\tau_3$ (ps) | $a_3$ |
| 267                        | 340            |               | 0.75  |               | 0.24  |               | 0.01  |
|                            | 460            |               | -0.08 |               | 0.49  |               | 0.42  |
|                            | 520            |               | -0.28 |               | 0.21  |               | 0.51  |
|                            |                | 0.24±0.02     |       | 1.01±0.04     |       | 4.10±0.16     |       |
| 285                        | 340            |               | 0.75  |               | 0.24  |               | 0.01  |
|                            | 460            |               | -0.05 |               | 0.52  |               | 0.43  |
|                            | 520            |               | -0.37 |               | 0.20  |               | 0.43  |

Note: the negative amplitudes of the  $\tau_1$  (ps) component observed with the decay traces at ~460 and 520 nm are due to the initial growth of TRF intensity at the respective wavelengths.

**Figure S3** Comparison of the normalized fs time-resolved fluorescence spectra recorded at 5 ps after 285 (red), 267 (blue) and 245 nm (cyan) excitation of dG and dGMP in pH7 buffered water.

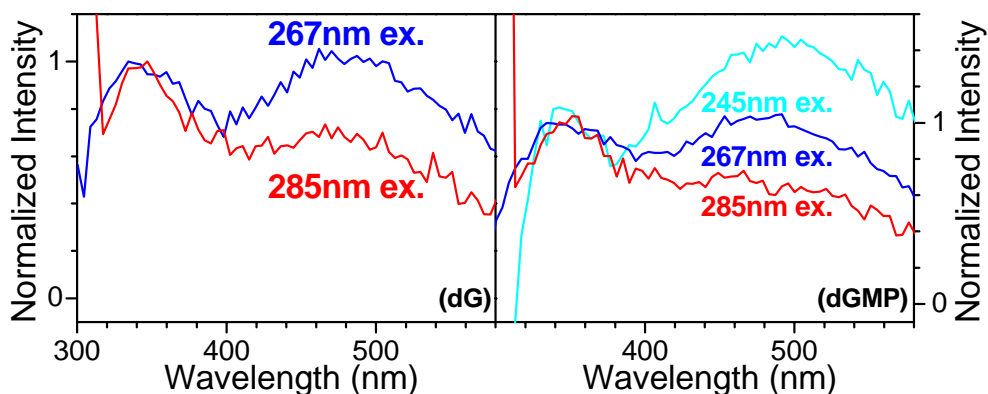

**Figure S4** Fs time-resolved fluorescence anisotropy spectra of dG in pH7 buffered water (a, b) and methanol (c, d) at initial ( $\sim 0$  ps) and  $\sim 5$  ps after excitation at 267 nm (a, c) and 285 nm (b, d).

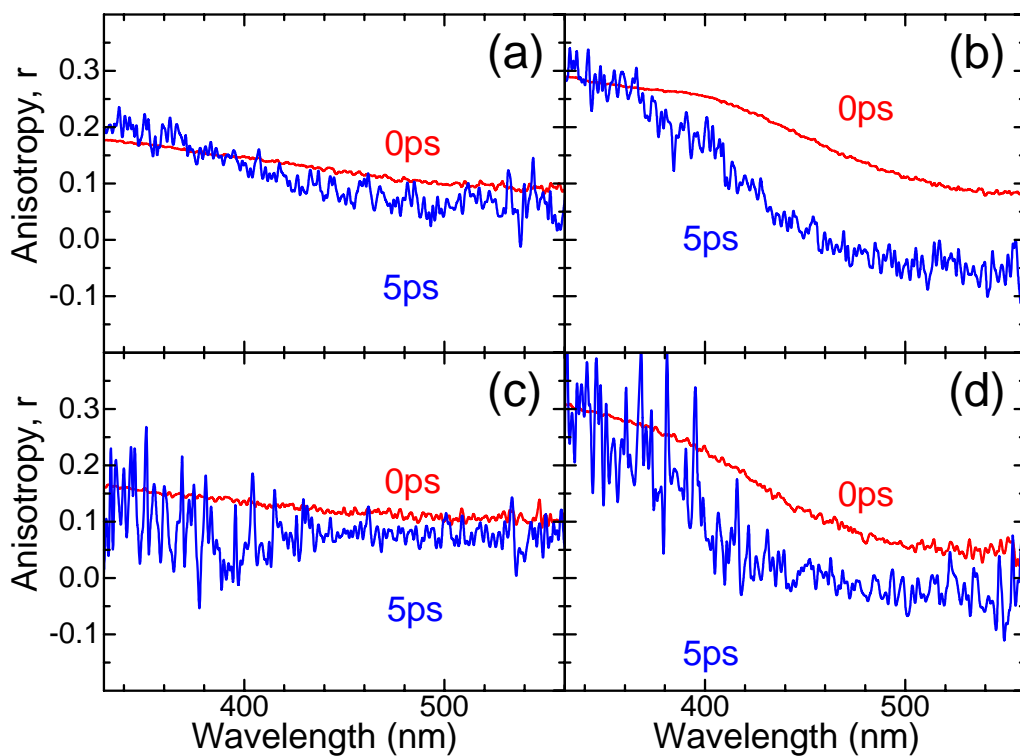

**Figure S5** Temporal evolution of fs transient absorption spectra (220-400 nm) recorded after 267 nm excitation of dG in (a) pH7 buffered water (0.15, 0.2, 0.7, 1, 1.25, 1.5, 1.75, 2.5, 3, 3.5, 5, 7, 15 and 20 ps), (b) pure water (0.15, 0.2, 0.7, 1, 1.25, 1.5, 1.75, 2, 2.5, 3, 3.5, 5, 7 and 20 ps) and (c) deuterated water (0.15, 0.2, 0.7, 1, 1.25, 1.75, 2, 2.5, 3, 4, 5, 6, 7 and 20 ps). # artifact from excitation laser.

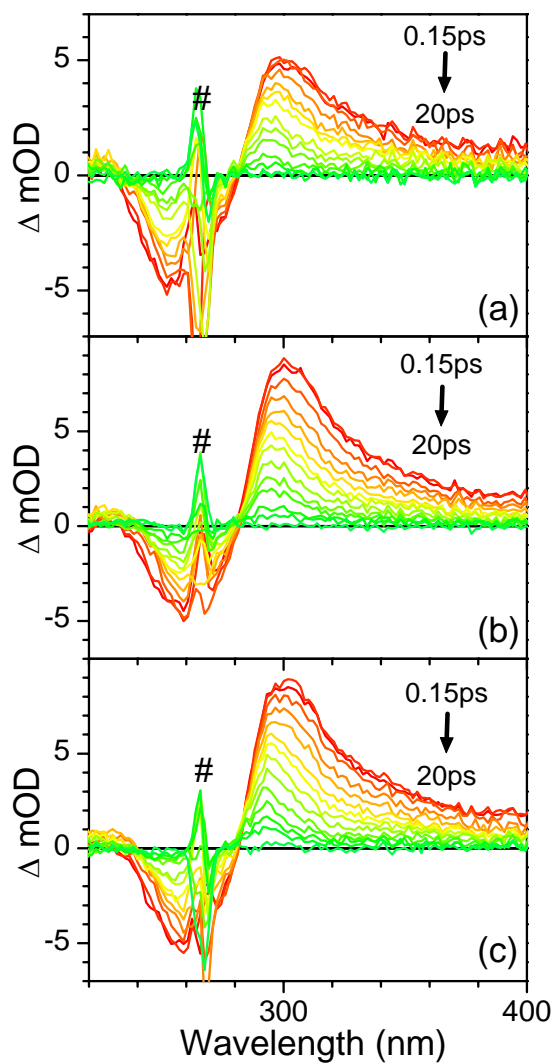

**Figure S6** Experimental (square and circle) and fitted (lines) transient absorption decay profiles recorded at ~253 (square, inversion of the negative values) and 305 nm (circle) after the 267 nm excitation of dG and dGMP in pH7 buffered water (pH7), pure water (H<sub>2</sub>O), deuterated water (D<sub>2</sub>O) and methanol (CH<sub>3</sub>OH).

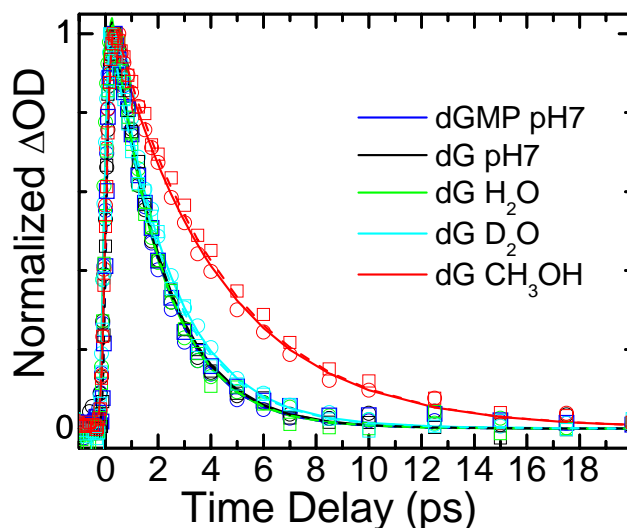

**Table S2** Fitting parameters obtained from global analysis of the fs transient absorption decay profiles at the selected <sup>a</sup>probe wavelengths.

|                        |                               | dGMP ( $\lambda_{\text{ex}}=267$ nm) |       |               |       |               |       |
|------------------------|-------------------------------|--------------------------------------|-------|---------------|-------|---------------|-------|
|                        | <sup>a</sup> $\lambda_p$ (nm) | $\tau_1$ (ps)                        | $A_1$ | $\tau_2$ (ps) | $A_2$ | $\tau_3$ (ps) | $A_3$ |
| H <sub>2</sub> O(pH7)  | 253                           |                                      |       |               |       | 2.00          | -1.00 |
|                        | 305                           |                                      |       |               |       |               | 1.00  |
|                        | 350                           | 0.27                                 | -0.09 | 0.81          | 0.39  |               | 0.53  |
|                        | 520                           | 0.27                                 | 0.45  | 0.81          | 0.55  |               |       |
|                        |                               | dG ( $\lambda_{\text{ex}}=267$ nm)   |       |               |       |               |       |
|                        | <sup>a</sup> $\lambda_p$ (nm) | $\tau_1$ (ps)                        | $A_1$ | $\tau_2$ (ps) | $A_2$ | $\tau_3$ (ps) | $A_3$ |
| H <sub>2</sub> O(pH7)  | 253                           |                                      |       |               |       | 1.99          | -1.00 |
|                        | 305                           |                                      |       |               |       |               | 1.00  |
|                        | 350                           | 0.23                                 | -0.25 | 0.85          | 0.24  |               | 0.51  |
| H <sub>2</sub> O(neat) | 253                           |                                      |       |               |       | 1.94          | -1.00 |
|                        | 305                           |                                      |       |               |       |               | 1.00  |
|                        | 350                           | 0.26                                 | -0.27 | 0.85          | 0.34  |               | 0.40  |
| D <sub>2</sub> O       | 253                           |                                      |       |               |       | 2.25          | -1.00 |
|                        | 305                           |                                      |       |               |       |               | 1.00  |
|                        | 350                           | 0.25                                 | -0.27 | 0.86          | 0.20  |               | 0.53  |
| CH <sub>3</sub> OH     | 253                           |                                      |       |               |       | 4.10          | -1.00 |
|                        | 305                           |                                      |       |               |       |               | 1.00  |
|                        | 350                           | 0.27                                 | -0.17 | 0.79          | 0.24  |               | 0.59  |
|                        | 520                           | 0.27                                 | 0.68  | 0.79          | 0.32  |               |       |

## References:

1. (a) W. M. Kwok, C. Ma and D. L. Phillips, Femtosecond time- and wavelength-resolved fluorescence and absorption spectroscopic study of the excited states of adenosine and an adenine oligomers, *J. Am. Chem. Soc.*, 2006, **128**, 11894-11905; (b) W. M. Kwok, C. Ma and D. L. Phillips, A doorway state leads to photo-stability or triplet photo-damage in thymine DNA, *J. Am. Chem. Soc.* 2008, **130**, 5131-5139; (c) W. M. Kwok, C. Ma and D. L. Phillips, "Bright" and "Dark" excited states of an alternating AT oligomer characterized by femtosecond broadband spectroscopy, *J. Phys. Chem. B*, 2009, **113**, 11527-11534; (d) C. T. L. Chan, C. C. W. Cheng, K. Y. F. Ho and W. M. Kwok, Femtosecond broadband time-resolved fluorescence and transient absorption study of the intramolecular charge transfer state of methyl 4-dimethylaminobenzoate, *Phys. Chem. Chem. Phys.*, 2011, **13**, 16306-16313.
2. F. A. Miannay, T. Gustavsson, A. Banyasz and D. Markovitsi, Excited-state dynamics of dGMP measured by steady-state and femtosecond fluorescence spectroscopy, *J. Phys. Chem. A*, 2010, **114**, 3256-3263.
3. D. Onidas, D. Markovitsi, S. Marguet, A. Sharonov and T. Gustavsson, Fluorescence properties of DNA nucleosides and nucleotides: A refined steady-state and femtosecond investigation, *J. Phys. Chem. B*, 2002, **106**, 11367-11374;
